# Supplementary material for: The Effect of Temperature on Anopheles Mosquito Population Dynamics and the Potential for Malaria Transmission
Source: PubMed Central journal article supplement (PMC3828393; doi:10.1371/journal.pone.0079276), 2013-11-14
Supplement: pone.0079276.s014.pdf [file pone.0079276.s014.pdf]

**Table S1. Sensitivity values assuming linear density-dependence** The sensitivity values are the percent change in the adult and larval equilibrium abundance and adult recruitment in response to a 5% change in the parameter in the model assuming linear density-dependence.

| Parameter                                   | 20°C       | 24°C       | 28°C       | 32°C       |
|---------------------------------------------|------------|------------|------------|------------|
| <b>Adult Sensitivity Values</b>             |            |            |            |            |
| $\rho$                                      | -5.65e - 1 | -6.28e - 1 | -6.25e - 1 | -3.90e - 1 |
| $\alpha_I$                                  | 2.05       | 1.98       | 1.98       | 2.71       |
| $\sigma_{in}$                               | -1.00      | -1.00      | -1.00      | -1.00      |
| $\mu_0$                                     | -4.36e - 1 | -3.37e - 1 | -3.76e - 1 | -6.11e - 1 |
| $\mu_1$                                     | -2.38e - 3 | 1.61e - 2  | 1.09e - 1  | 1.34       |
| $\mu_2$                                     | 7.80e - 5  | 1.87e - 3  | 6.63e - 2  | 6.85e - 1  |
| $\mu_3$                                     | -5.21e - 2 | 1.80e - 2  | 2.07e - 2  | -7.10e - 2 |
| $\mu_4$                                     | -2.01e - 1 | -1.88e - 2 | -8.46e - 2 | 10.44      |
| $\mu_5$                                     | 2.24e - 2  | -8.58e - 4 | -2.41e - 2 | 3.02       |
| $\gamma_E$                                  | 2.50e - 1  | 2.50e - 1  | 2.50e - 1  | 2.50e - 1  |
| $\gamma_L$                                  | -2.01      | -2.01      | -2.01      | -2.01      |
| $\gamma_P$                                  | 2.50e - 1  | 2.50e - 1  | 2.50e - 1  | 2.50e - 1  |
| <b>Larval Sensitivity Values</b>            |            |            |            |            |
| $\rho$                                      | 2.35e - 1  | 1.94e - 1  | 1.97e - 1  | 3.73e - 1  |
| $\alpha_I$                                  | 1.34       | 1.17       | 1.24       | 2.34       |
| $\sigma_{in}$                               | -1.00      | -1.00      | -1.00      | -1.00      |
| $\mu_0$                                     | -2.35e - 1 | -1.94e - 1 | -1.97e - 1 | -3.73e - 1 |
| $\mu_1$                                     | -1.28e - 3 | 8.37e - 3  | 1.10e - 1  | 8.23e - 1  |
| $\mu_2$                                     | 4.20e - 5  | 9.74e - 4  | 3.48e - 2  | 4.20e - 1  |
| $\mu_3$                                     | -3.44e - 1 | -1.72e - 1 | -2.37e - 1 | -1.34e - 1 |
| $\mu_4$                                     | -1.17      | -1.93e - 1 | 1.35       | 14.09      |
| $\mu_5$                                     | 1.48e - 1  | 8.18e - 3  | 2.83e - 1  | 5.27       |
| $\gamma_E$                                  | 1.25e - 1  | 1.25e - 1  | 1.25e - 1  | 1.25e - 1  |
| $\gamma_L$                                  | -1.00      | -1.00      | -1.00      | -1.00      |
| $\gamma_P$                                  | 1.25e - 1  | 1.25e - 1  | 1.25e - 1  | 1.25e - 1  |
| <b>Adult Recruitment Sensitivity Values</b> |            |            |            |            |
| $\rho$                                      | -5.65e - 1 | -6.28e - 1 | -6.25e - 1 | -3.90e - 1 |
| $\alpha_I$                                  | 2.05       | 1.98       | 1.98       | 2.71       |
| $\sigma_{in}$                               | -1.00      | -1.00      | -1.00      | -1.00      |
| $\mu_0$                                     | 5.64e - 1  | 6.28e - 1  | 6.25e - 1  | 3.90e - 1  |
| $\mu_1$                                     | 3.08e - 3  | -2.71e - 2 | -3.50e - 1 | -8.59e - 1 |
| $\mu_2$                                     | -1.01e - 4 | -3.15e - 3 | -1.10e - 1 | -4.39e - 1 |
| $\mu_3$                                     | -5.21e - 2 | 1.80e - 2  | 2.07e - 2  | -7.10e - 1 |
| $\mu_4$                                     | -2.01e - 1 | 1.88e - 2  | -8.46e - 2 | 10.44      |
| $\mu_5$                                     | 2.24e - 2  | -8.58e - 4 | -2.41e - 2 | 3.02       |
| $\gamma_E$                                  | 2.50e - 1  | 2.50e - 1  | 2.50e - 1  | 2.50e - 1  |
| $\gamma_L$                                  | -2.01      | -2.01      | -2.01      | -2.01      |
| $\gamma_P$                                  | 2.50e - 1  | 2.50e - 1  | 2.50e - 1  | 2.50e - 1  |
