# Supplementary material for: The Effect of Temperature on Anopheles Mosquito Population Dynamics and the Potential for Malaria Transmission
Source: PubMed Central journal article supplement (PMC3828393; doi:10.1371/journal.pone.0079276), 2013-11-14
Supplement: pone.0079276.s015.pdf [file pone.0079276.s015.pdf]

**Table S2. Potentially infectious abundance sensitivity values assuming linear density-dependence** The sensitivity values are the percent change in the potentially infectious adult abundance calculated using the Detinova or the Paaijmans curve in response to a 5% change in the parameter in the model assuming linear density-dependence.

| Parameter                                       | 20°C       | 24°C       | 28°C       | 32°C       |
|-------------------------------------------------|------------|------------|------------|------------|
| <b>Sensitivity Values using Detinova Curve</b>  |            |            |            |            |
| $\rho$                                          | -5.65e - 1 | -6.28e - 1 | -6.25e - 1 | -3.90e - 1 |
| $\alpha_I$                                      | 2.05       | 1.98       | 1.98       | 2.71       |
| $\sigma_{lin}$                                  | -1.00      | -1.00      | -1.00      | -1.00      |
| $\mu_0$                                         | -1.90      | -6.02e - 1 | -2.31e - 1 | -4.21e - 1 |
| $\mu_1$                                         | -1.04e - 2 | 2.62e - 2  | 1.33e - 1  | 9.62e - 1  |
| $\mu_2$                                         | 3.40e - 4  | 3.04e - 3  | 4.13e - 2  | 4.83e - 1  |
| $\mu_3$                                         | -5.21e - 2 | -1.89e - 2 | 2.07e - 2  | -7.10e - 1 |
| $\mu_4$                                         | -2.01e - 1 | 1.88e - 2  | -8.46e - 2 | 10.44      |
| $\mu_5$                                         | 2.24e - 2  | -8.58e - 4 | -2.41e - 2 | 3.02       |
| $\gamma_E$                                      | 2.50e - 1  | 2.50e - 1  | 2.50e - 1  | 2.50e - 1  |
| $\gamma_L$                                      | -2.01      | -2.01      | -2.01      | -2.01      |
| $\gamma_P$                                      | 2.50e - 1  | 2.50e - 1  | 2.50e - 1  | 2.50e - 1  |
| <b>Sensitivity Values using Paaijmans Curve</b> |            |            |            |            |
| $\rho$                                          | -5.65e - 1 | -6.28e - 1 | -6.25e - 1 | -3.90e - 1 |
| $\alpha_I$                                      | 2.05       | 1.98       | 1.98       | 2.71       |
| $\sigma_{lin}$                                  | -1.00      | -1.00      | -1.00      | -1.00      |
| $\mu_0$                                         | -1.65      | -5.26e - 1 | -2.59e - 1 | -7.44e - 1 |
| $\mu_1$                                         | -9.03e - 3 | 2.29e - 2  | 1.49e - 1  | 1.67       |
| $\mu_2$                                         | 2.96e - 4  | 2.66e - 3  | 4.63e - 2  | 8.46e - 1  |
| $\mu_3$                                         | -5.21e - 2 | -1.89e - 2 | 2.07e - 2  | -7.10e - 1 |
| $\mu_4$                                         | -2.01e - 1 | 1.88e - 2  | -8.46e - 2 | 10.44      |
| $\mu_5$                                         | 2.24e - 2  | -8.58e - 4 | -2.41e - 2 | 3.02       |
| $\gamma_E$                                      | 2.50e - 1  | 2.50e - 1  | 2.50e - 1  | 2.50e - 1  |
| $\gamma_L$                                      | -2.01      | -2.01      | -2.01      | -2.01      |
| $\gamma_P$                                      | 2.50e - 1  | 2.50e - 1  | 2.50e - 1  | 2.50e - 1  |
