# Supplementary material for: The Effect of Temperature on Anopheles Mosquito Population Dynamics and the Potential for Malaria Transmission
Source: PubMed Central journal article supplement (PMC3828393; doi:10.1371/journal.pone.0079276), 2013-11-14
Supplement: pone.0079276.s016.pdf [file pone.0079276.s016.pdf]

**Table S3. Periodicity of Fluctuations**

| <b>Temperature</b> | <b>Generation Time (Days)</b> | <b>Period (Days)</b> | <b>2 x Juvenile Development Delay</b> |
|--------------------|-------------------------------|----------------------|---------------------------------------|
| 20                 | 31.08                         | 36.93                | 39.59                                 |
| 21                 | 29.48                         | 34.98                | 36.39                                 |
| 22                 | 28.08                         | 32.78                | 33.58                                 |
| 23                 | 26.84                         | 30.80                | 31.10                                 |
| 24                 | 25.72                         | 28.61                | 28.90                                 |
| 25                 | 24.71                         | 27.06                | 26.93                                 |
| 26                 | 23.75                         | 25.29                | 25.17                                 |
