# Supplementary material for: The Effect of Temperature on Anopheles Mosquito Population Dynamics and the Potential for Malaria Transmission
Source: PubMed Central journal article supplement (PMC3828393; doi:10.1371/journal.pone.0079276), 2013-11-14
Supplement: pone.0079276.s017.pdf [file pone.0079276.s017.pdf]

**Table S4. Sensitivity values assuming exponential density-dependence** The sensitivity values are the percent change in the adult and larval equilibrium abundance and adult recruitment in response to a 5% change in the parameter in the model assuming exponential density-dependence.

| Parameter                                   | 20°C       | 24°C       | 28°C        | 32°C        |
|---------------------------------------------|------------|------------|-------------|-------------|
| <b>Adult Sensitivity Values</b>             |            |            |             |             |
| $\rho$                                      | $-4.06e-1$ | $-5.64e-1$ | $-7.53e-1$  | $-5.44e-1$  |
| $\alpha_I$                                  | 1.02       | $7.60e-1$  | 1.18        | 1.75        |
| $\sigma_{exp}$                              | -1.00      | -1.00      | -1.00       | -1.00       |
| $\mu_0$                                     | $9.88e-2$  | $1.90e-1$  | $-2.49e-1$  | $4.57e-1$   |
| $\mu_1$                                     | $-2.19e-3$ | $-8.46e-3$ | $1.39e-1$   | 1.00        |
| $\mu_2$                                     | $9.68e-7$  | $-9.83e-4$ | $4.38e-2$   | $5.13e-1$   |
| $\mu_3$                                     | $-7.27e-1$ | $-3.93e-1$ | $-1.81e-1$  | $-7.46e-1$  |
| $\mu_4$                                     | $-1.77e-1$ | $4.29e-1$  | $9.93e-1$   | 10.91       |
| $\mu_5$                                     | $3.11e-1$  | $1.80e-2$  | $2.15e-1$   | $3.13e-1$   |
| $\gamma_E$                                  | $2.11e-1$  | $1.89e-1$  | $1.25e-1$   | $1.25e-1$   |
| $\gamma_L$                                  | -1.64      | -1.59      | -1.00       | -1.00       |
| $\gamma_P$                                  | $2.11e-1$  | $1.89e-1$  | $1.25e-1$   | $1.25e-1$   |
| <b>Larval Sensitivity Values</b>            |            |            |             |             |
| $\rho$                                      | $1.29e-1$  | $9.04e-1$  | $6.99e-2$   | $2.20e-1$   |
| $\alpha_I$                                  | $5.11e-1$  | $3.23e-1$  | $4.39e-1$   | 1.38        |
| $\sigma_{exp}$                              | -1.00      | -1.00      | -1.00       | -1.00       |
| $\mu_0$                                     | $-5.10e-2$ | $-9.09e-3$ | $-6.99e-2$  | $-2.20e-1$  |
| $\mu_1$                                     | $9.63e-5$  | $3.37e-4$  | $3.92e-2$   | $4.86e-1$   |
| $\mu_2$                                     | $-2.56e-5$ | $1.33e-5$  | $1.23e-2$   | $2.48e-1$   |
| $\mu_3$                                     | $-5.88e-1$ | $-4.05e-1$ | $-4.39e-1$  | -1.39       |
| $\mu_4$                                     | -1.85      | $4.44e-1$  | 2.40        | 14.74       |
| $\mu_5$                                     | $2.50e-1$  | $1.92e-3$  | $5.22e-1$   | $5.40e-1$   |
| $\gamma_E$                                  | $1.06e-2$  | $1.02e-2$  | $-1.84e-10$ | $-4.44e-10$ |
| $\gamma_L$                                  | $-7.22e-2$ | $-8.10e-2$ | $5.20e-12$  | $-4.69e-10$ |
| $\gamma_P$                                  | $1.07e-2$  | $1.02e-2$  | $-1.86e-10$ | $-4.13e-10$ |
| <b>Adult Recruitment Sensitivity Values</b> |            |            |             |             |
| $\rho$                                      | $-4.24e-1$ | $-5.55e-1$ | $-7.53e-1$  | $-5.44e-1$  |
| $\alpha_I$                                  | 1.01       | $7.72e-1$  | 1.18        | 1.75        |
| $\sigma_{exp}$                              | -1.00      | -1.00      | -1.00       | -1.00       |
| $\mu_0$                                     | 1.09       | 1.20       | $7.52e-1$   | $5.44e-1$   |
| $\mu_1$                                     | $-1.05e-3$ | $-3.57e-2$ | $-4.21e-1$  | -1.20       |
| $\mu_2$                                     | $6.04e-5$  | $-5.58e-3$ | $-1.33e-1$  | $-6.13e-1$  |
| $\mu_3$                                     | $-7.21e-1$ | $-4.20e-1$ | $-1.81e-1$  | $-7.46e-1$  |
| $\mu_4$                                     | -1.78      | $-4.38e-1$ | $9.93e-1$   | 10.91       |
| $\mu_5$                                     | $3.24e-1$  | $2.03e-2$  | $2.15e-1$   | 3.13        |
| $\gamma_E$                                  | $2.10e-1$  | $1.64e-1$  | $1.25e-1$   | $1.25e-1$   |
| $\gamma_L$                                  | -1.62      | -1.60      | -1.00       | -1.00       |
| $\gamma_P$                                  | $2.10e-1$  | $1.64e-1$  | $1.25e-1$   | $1.25e-1$   |
