# Supplementary material for: The Effect of Temperature on Anopheles Mosquito Population Dynamics and the Potential for Malaria Transmission
Source: PubMed Central journal article supplement (PMC3828393; doi:10.1371/journal.pone.0079276), 2013-11-14
Supplement: pone.0079276.s018.pdf [file pone.0079276.s018.pdf]

**Table S5. Potentially infectious abundance sensitivity values assuming exponential density-dependence** The sensitivity values are the percent change in the potentially infectious adult abundance calculated using the Detinova or the Paaijmans curve in response to a 5% change in the parameter in the model assuming exponential density-dependence.

| Parameter                                       | 20°C       | 24°C       | 28°C       | 32°C       |
|-------------------------------------------------|------------|------------|------------|------------|
| <b>Sensitivity Values using Detinova Curve</b>  |            |            |            |            |
| $\rho$                                          | -4.24e - 1 | -5.55e - 1 | -7.53e - 1 | -5.44e - 1 |
| $\alpha_I$                                      | 1.01       | 7.72e - 1  | 1.18       | 1.75       |
| $\sigma_{exp}$                                  | -1.00      | -1.00      | -1.00      | -1.00      |
| $\mu_0$                                         | 1.09       | 1.20       | 7.52e - 1  | 5.44e - 1  |
| $\mu_1$                                         | -1.05e - 3 | -3.57e - 2 | -4.21e - 1 | -1.20      |
| $\mu_2$                                         | 6.04e - 5  | -5.58e - 3 | -1.33e - 1 | -6.13e - 1 |
| $\mu_3$                                         | -7.21e - 1 | -4.20e - 1 | -1.81e - 1 | -7.46e - 1 |
| $\mu_4$                                         | -1.78      | -4.38e - 1 | 9.93e - 1  | 10.91      |
| $\mu_5$                                         | 3.24e - 1  | 2.03e - 2  | 2.15e - 1  | 3.13       |
| $\gamma_E$                                      | 2.10e - 1  | 1.64e - 1  | 1.25e - 1  | 1.25e - 1  |
| $\gamma_L$                                      | -1.62      | -1.60      | -1.00      | -1.00      |
| $\gamma_P$                                      | 2.10e - 1  | 1.64e - 1  | 1.25e - 1  | 1.25e - 1  |
| <b>Sensitivity Values using Paaijmans Curve</b> |            |            |            |            |
| $\rho$                                          | -4.24e - 1 | -5.55e - 1 | -7.53e - 1 | -5.44e - 1 |
| $\alpha_I$                                      | 1.01       | 7.72e - 1  | 1.18       | 1.75       |
| $\sigma_{exp}$                                  | -1.00      | -1.00      | -1.00      | -1.00      |
| $\mu_0$                                         | 1.09       | 1.20       | 7.52e - 1  | 5.44e - 1  |
| $\mu_1$                                         | -1.05e - 3 | -3.57e - 2 | -4.21e - 1 | -1.20      |
| $\mu_2$                                         | 6.04e - 5  | -5.58e - 3 | -1.33e - 1 | -6.13e - 1 |
| $\mu_3$                                         | -7.21e - 1 | -4.20e - 1 | -1.81e - 1 | -7.46e - 1 |
| $\mu_4$                                         | -1.78      | -4.38e - 1 | 9.93e - 1  | 10.91      |
| $\mu_5$                                         | 3.24e - 1  | 2.03e - 2  | 2.15e - 1  | 3.13       |
| $\gamma_E$                                      | 2.10e - 1  | 1.64e - 1  | 1.25e - 1  | 1.25e - 1  |
| $\gamma_L$                                      | -1.62      | -1.60      | -1.00      | -1.00      |
| $\gamma_P$                                      | 2.10e - 1  | 1.64e - 1  | 1.25e - 1  | 1.25e - 1  |
